# Supplementary material for: Cardiothoracic ratio values and trajectories are associated with risk of requiring dialysis and mortality in chronic kidney disease
Source: Springer Nature journal article supplement (doi:10.1038/s43856-023-00241-9), 2023-02-07

## **Supplementary Material**

**Supplementary Table 1.** Frequency of CTR measurement in the study population

**Supplementary Table 2.** The Characteristics of Selected Echocardiographic Parameters by Baseline CTR Quartile

**Supplementary Figure 1.** Model Architecture of U-Net for the CTR Estimation Algorithm

**Supplementary Figure 2.** ML-Based CTR estimation Based on Images From Each Baseline CTR Quartile

**Supplementary Figure 3.** Trajectory Group of CTR by LCMM

**Supplementary Figure 4.** Calibration Plot of Predicted and Observed Probability of (a) Progression to ESRD, (b) CV Mortality, and (c) All-cause Mortality

**Supplementary Figure 5.** Comparison of Distribution Curve for Baseline CTR for Outcomes of Interest: (a) Progression to ESRD, (b) CV Mortality, and (c)

All-cause Mortality

**Supplementary Table 1.** Frequency of CTR measurement in the study population

| No. of CTR<br>measurement | No. of patients | Percentage (%) |
|---------------------------|-----------------|----------------|
| 2                         | 656             | 26.52          |
| 3                         | 488             | 19.73          |
| 4                         | 361             | 14.59          |
| 5                         | 254             | 10.27          |
| 6                         | 156             | 6.31           |
| 7                         | 134             | 5.42           |
| 8                         | 116             | 4.69           |
| 9                         | 70              | 2.83           |
| ≥ 10                      | 239             | 9.64           |
| Total                     | 2474            | 100.00         |

**Supplementary Table 2.** The Characteristics of Selected Echocardiographic Parameters by Baseline CTR Quartile

| Characteristics                           | N (%)        | Total              | Baseline CTR (Quartile of baseline period) |                    |                    |                     | p-value |
|-------------------------------------------|--------------|--------------------|--------------------------------------------|--------------------|--------------------|---------------------|---------|
|                                           |              |                    | CTR < 0.47                                 | 0.47 ≤ CTR < 0.52  | 0.52 ≤ CTR < 0.57  | CTR ≥ 0.57          |         |
| Echocardiographic parameters <sup>a</sup> |              |                    |                                            |                    |                    |                     |         |
| Baseline population                       | 3117 (100.0) |                    |                                            |                    |                    |                     |         |
| Ejection fraction (%), median (IQR)       | 1193 (38.3)  | 59.6 (53.4, 65.0)  | 59.9 (55.2, 65.0)                          | 59.5 (54.3, 65.3)  | 60.9 (53.9, 65.3)  | 58.4 (50.4, 64.3)   | <0.01   |
| Ejection fraction < 45 %, n (%)           | 1193 (38.3)  | 148 (12.4)         | 16 (9.8)                                   | 18 (7.2)           | 35 (10.8)          | 79 (17.4)           | <0.01   |
| LVMI (g/m <sup>2</sup> ) , median (IQR)   | 1161 (37.2)  | 95.6 (79.6, 115.7) | 85.8 (68.7, 103.7)                         | 88.6 (73.3, 107.0) | 94.7 (78.8, 114.9) | 103.7 (86.1, 124.0) | <0.01   |
| LAVI (mL/m <sup>2</sup> ) , median (IQR)  | 1136 (36.4)  | 34.0 (25.5, 44.3)  | 26.8 (21.2, 35.5)                          | 30.6 (22.2, 38.5)  | 34.7 (26.3, 44.2)  | 39.3 (31.2, 50.0)   | <0.01   |
| Trajectory population                     | 2474 (100.0) |                    |                                            |                    |                    |                     |         |
| Ejection fraction (%), median (IQR)       | 1034 (41.8)  | 59.4 (52.8, 64.9)  | 59.5 (55.1, 64)                            | 59.4 (54.3, 64.9)  | 60.9 (53.9, 65.4)  | 58.0 (50.0, 64.5)   | <0.01   |
| Ejection fraction < 45 %, n (%)           | 1034 (41.8)  | 134 (13.0)         | 15 (10.2)                                  | 16 (7.3)           | 31 (11.2)          | 72 (18.4)           | <0.01   |
| LVMI (g/m <sup>2</sup> ), median (IQR)    | 1006 (40.7)  | 95.0 (79.3, 115.1) | 85.8 (68.7, 102)                           | 88.2 (72.8, 106.6) | 94.9 (78.8, 113.5) | 103.8 (85.9, 123.8) | <0.01   |
| LAVI (mL/m <sup>2</sup> ) , median (IQR)  | 983 (39.7)   | 34.1 (25.6, 44.8)  | 26.9 (21.5, 36.3)                          | 30.0 (22.1, 38.6)  | 35.4 (26.7, 45.0)  | 39.3 (31.2, 50.3)   | <0.01   |

<sup>a</sup> Echocardiographic parameters measurements that were obtained within -1 year to +1 year and closest to the index date.

Abbreviations: CTR, cardiothoracic ratio; IQR, interquartile range; LVMI, left ventricular mass index; LAVI, left atrial volume index.

**Supplementary Figure 1.** Model Architecture of U-Net for the CTR Estimation Algorithm

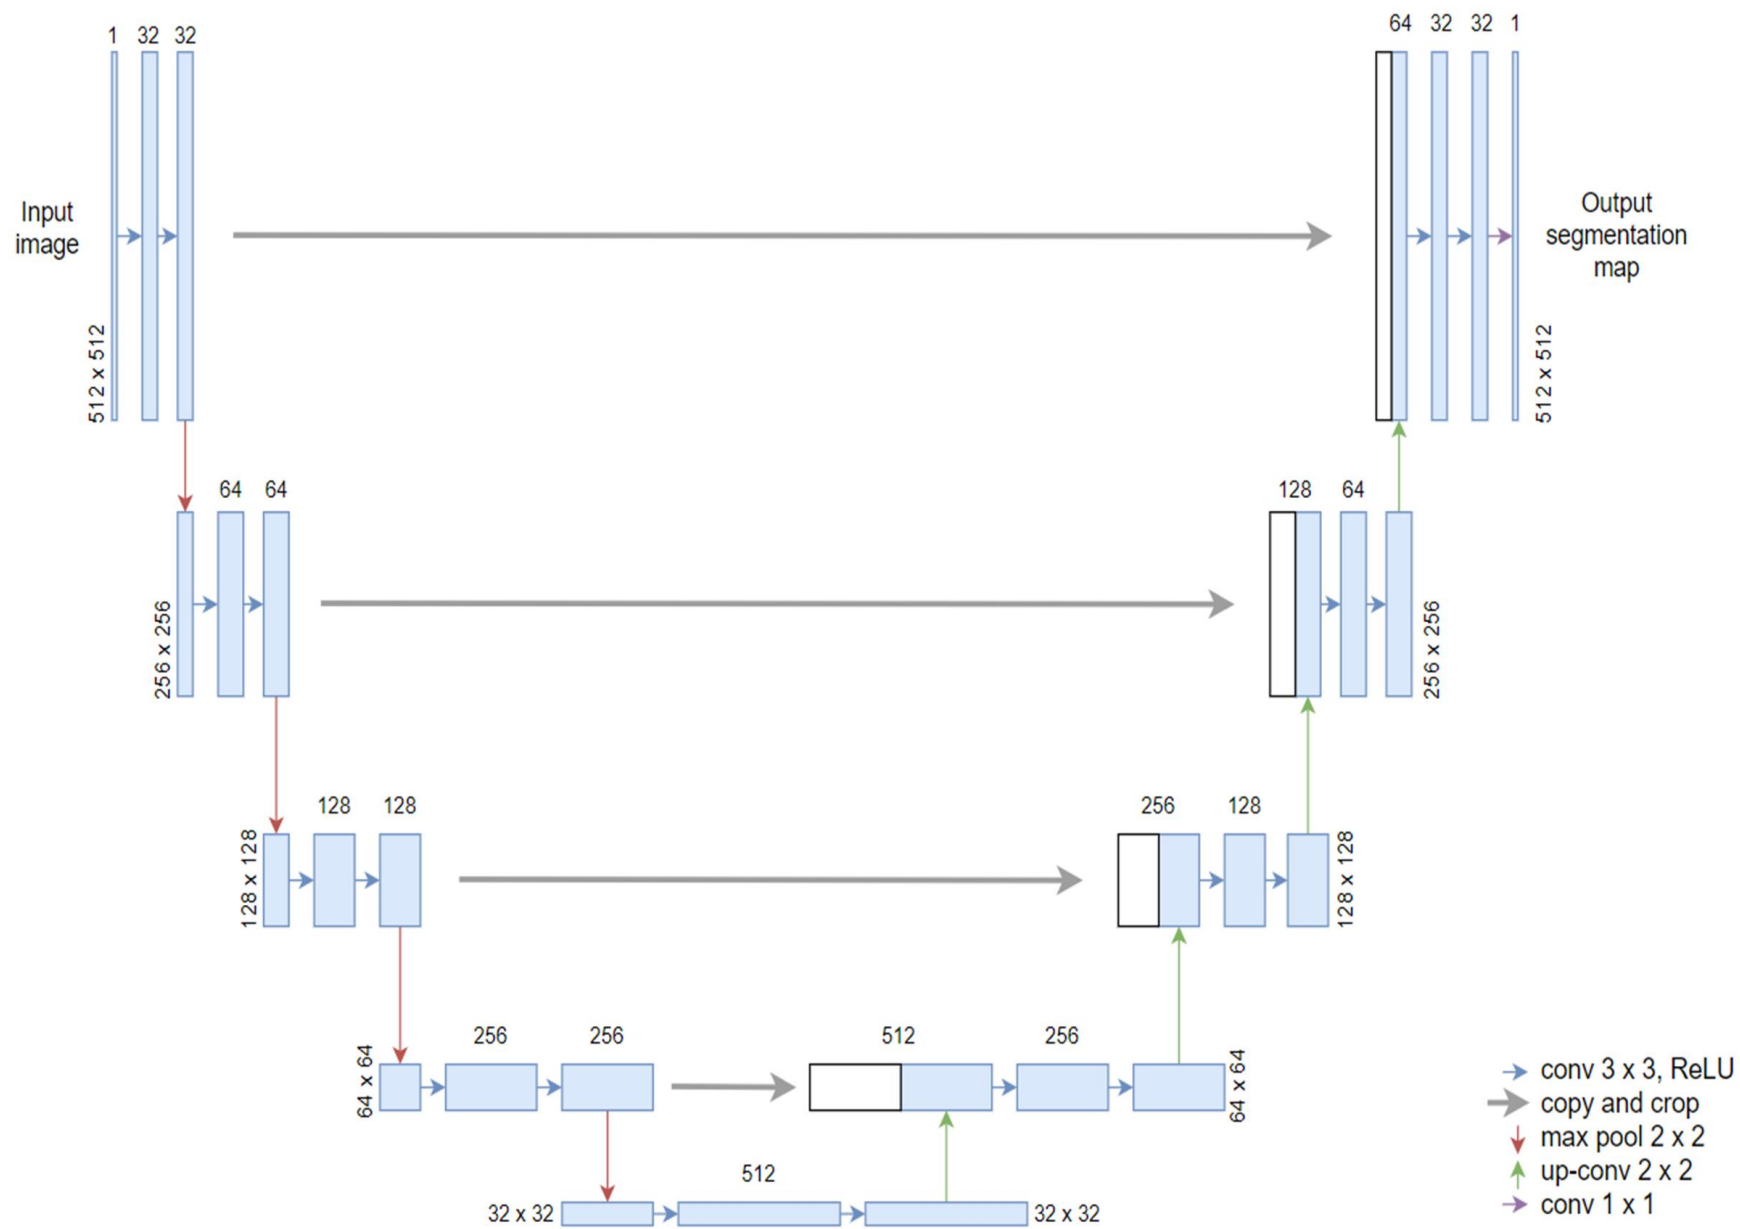

## Supplementary Figure 2. ML-Based CTR estimation Based on Images From Each Baseline CTR Quartile

(a)  $CTR < 0.47$

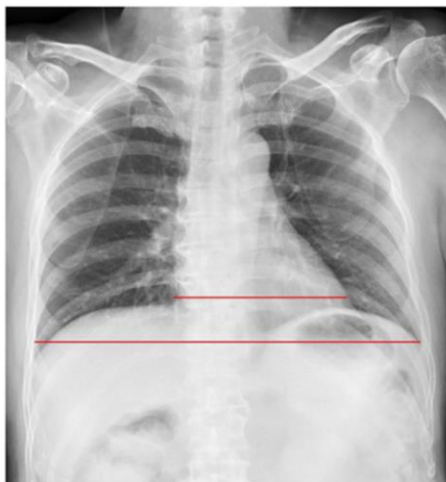

Age: 67  
Sex: Male  
Heart Length: 136.719 (mm)  
Lung Length: 304.199 (mm)  
CTR: 0.449

(b)  $0.47 \leq CTR < 0.52$

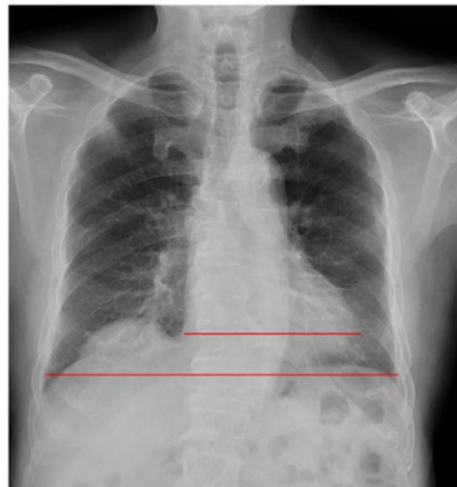

Age: 83  
Sex: Male  
Heart Length: 136.035 (mm)  
Lung Length: 271.387 (mm)  
CTR: 0.501

(c)  $0.52 \leq CTR < 0.57$

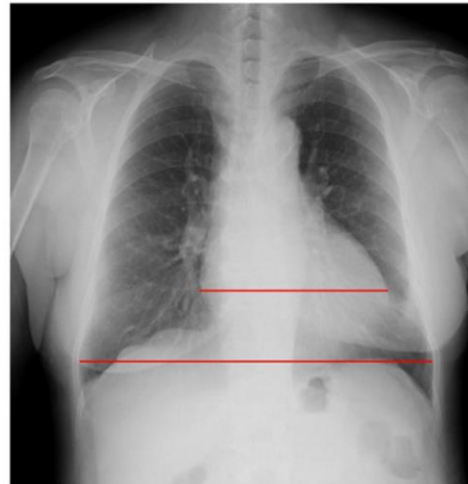

Age: 66  
Sex: Female  
Heart Length: 147.840 (mm)  
Lung Length: 277.200 (mm)  
CTR: 0.533

(d)  $CTR \geq 0.57$

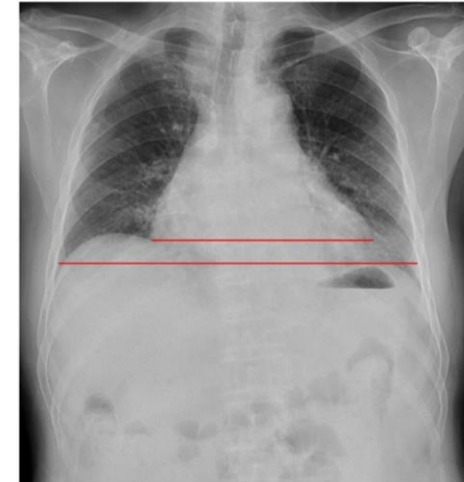

Age: 87  
Sex: Male  
Heart Length: 168.164 (mm)  
Lung Length: 272.754 (mm)  
CTR: 0.617

Supplementary Figure 3. Trajectory Group of CTR by LCMM

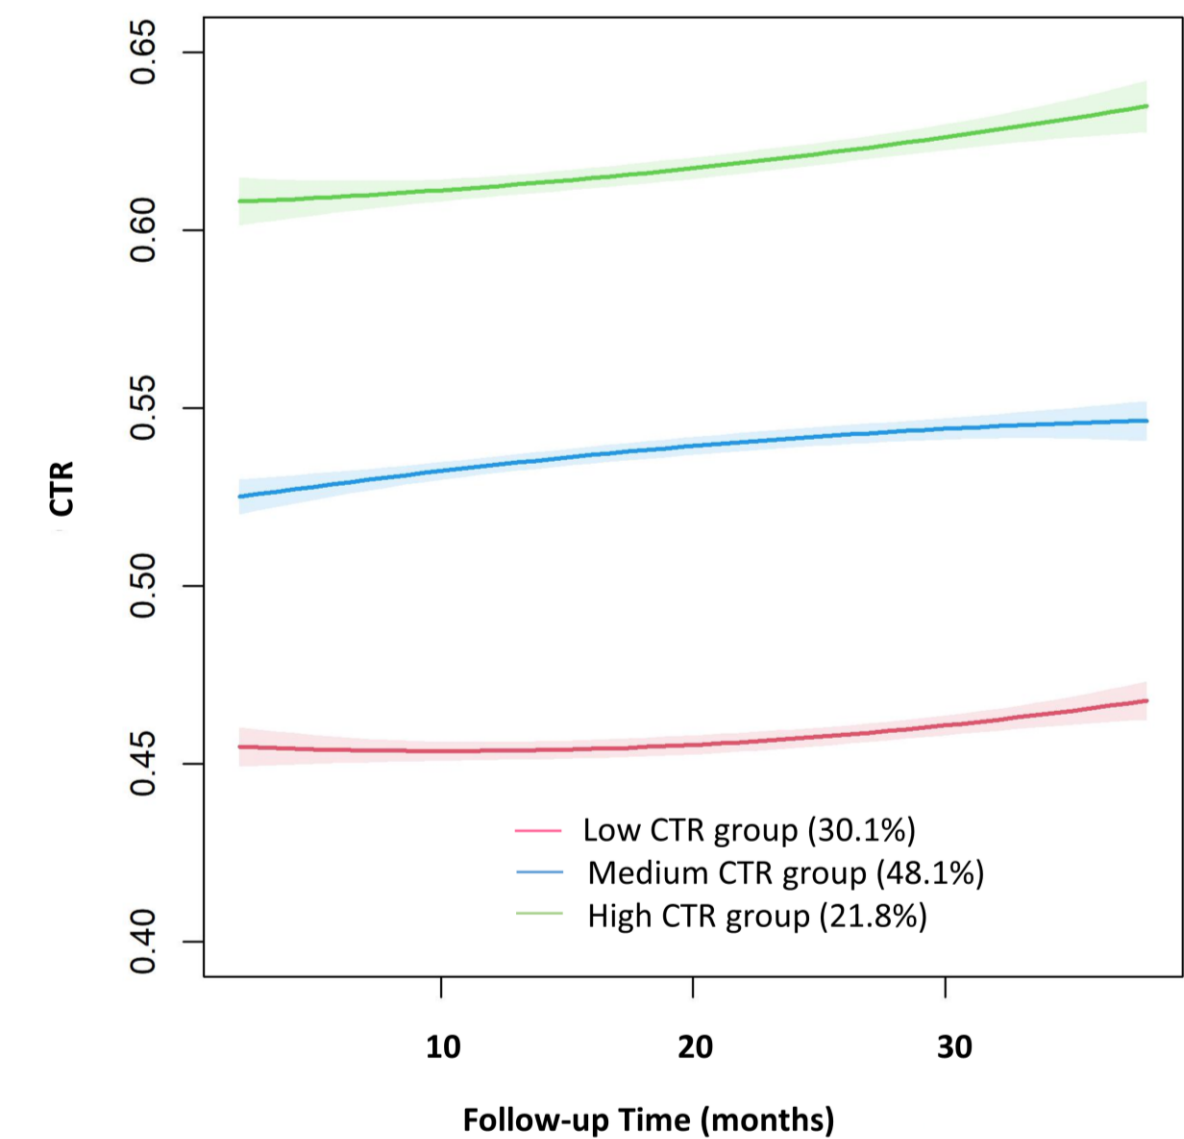

**Supplementary Figure 4.** Calibration Plot of Predicted and Observed Probability of (a) Progression to ESRD, (b) CV Mortality, and (c) All-cause Mortality

(a) Progression to ESRD

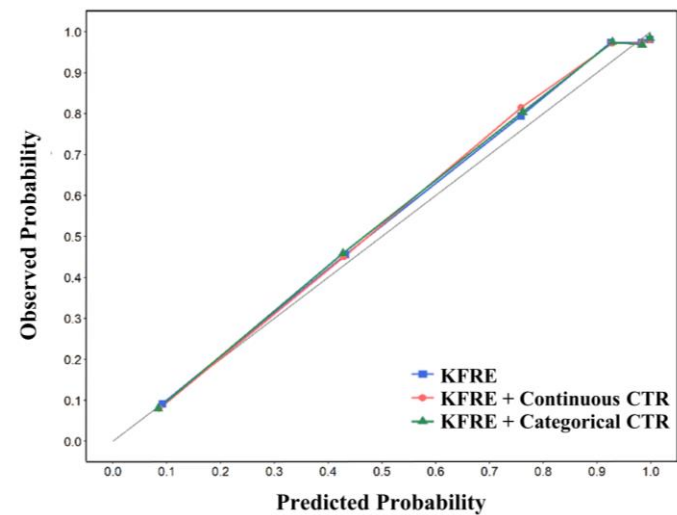

(b) CV Mortality

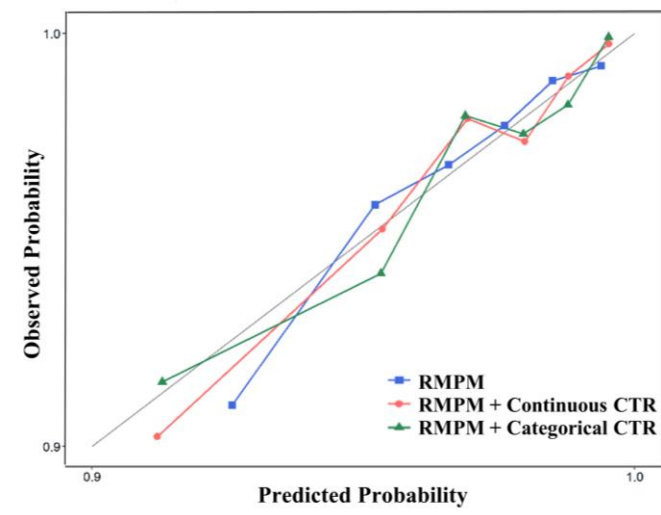

(c) All-cause Mortality

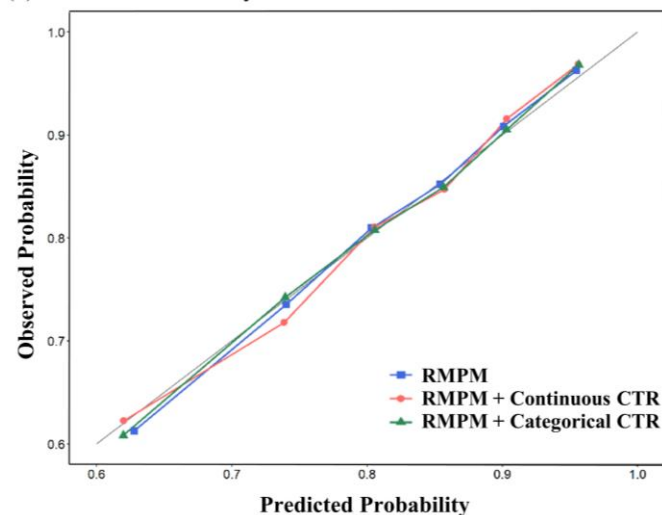

**Supplementary Figure 5.** Comparison of Distribution Curve for Baseline CTR for Outcomes of Interest: (a) Progression to ESRD, (b) CV Mortality, and (c) All-cause Mortality

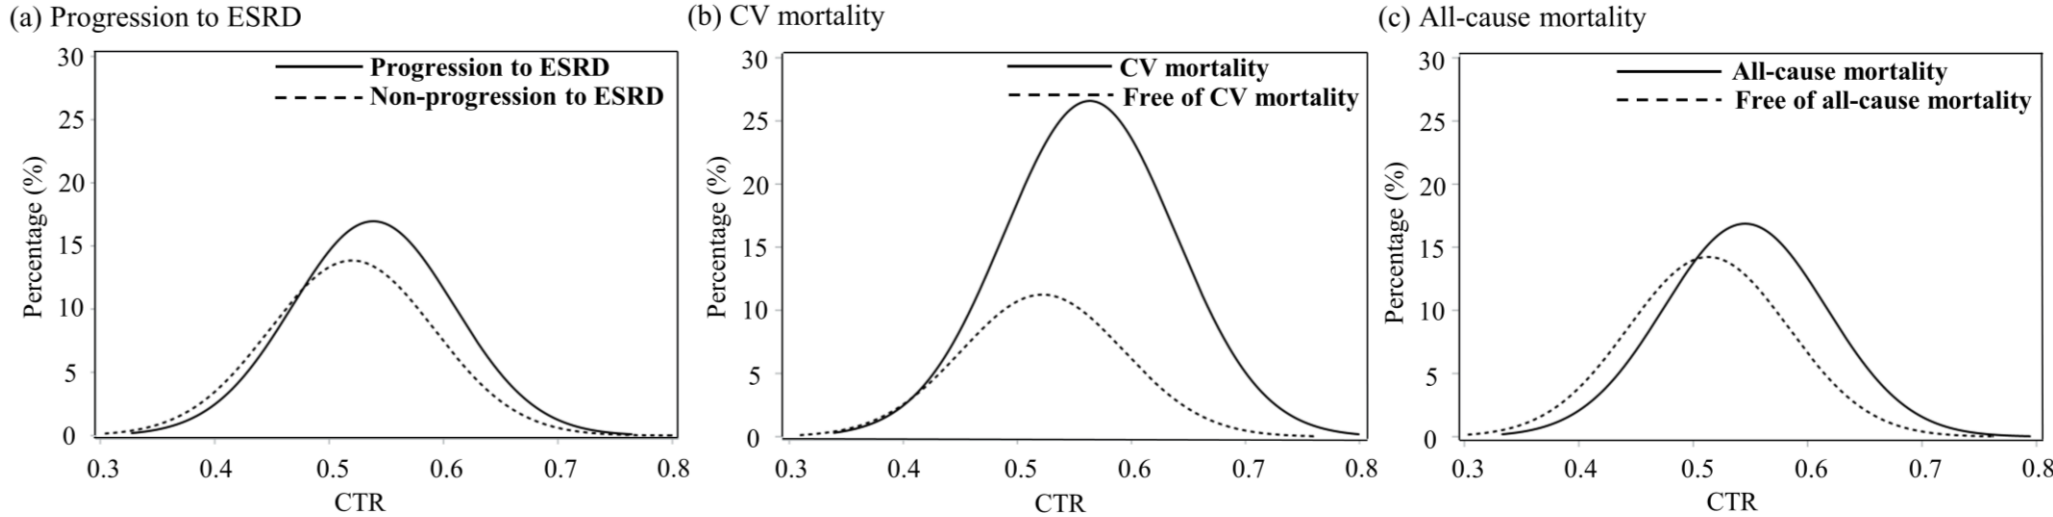

Supplement: MOESM7 [file 43856_2023_241_MOESM7_ESM.pdf]
